# **Long-term, layer-specific modification of spontaneous activity in the mouse somatosensory cortex following sensory stimulation**

Short title: Sensory-evoked modification of spontaneous activity

Elena Phoka<sup>a,b</sup>, Aleksandra Berdichevskaia<sup>a</sup>, Mauricio Barahona<sup>a,b</sup>, Simon R Schultz<sup>a,1</sup>

<sup>a</sup>Department of Bioengineering, Imperial College London, SW7 2BP, London, UK

<sup>b</sup>Department of Mathematics, Imperial College London, SW7 2RH, London, UK

<sup>1</sup>To whom correspondence should be addressed. Email: [s.schultz@imperial.ac.uk](mailto:s.schultz@imperial.ac.uk)

Simon R Schultz

Department of Bioengineering

Imperial College London

SW7 2BP

London, UK

Email: [s.schultz@imperial.ac.uk](mailto:s.schultz@imperial.ac.uk)

Tel: +44 (0) 207 594 1533

Fax: +44 (0) 207 594 9817

Author contributions: E.P., M.B. and S.R.S. jointly conceived the study and designed the experiments. E.P. performed the electrophysiological recordings, collected and analyzed the data. A.B. performed the histological and imaging procedures. E.P., M.B. and S.R.S. wrote the manuscript.

Keywords

Barrel cortex, plasticity, spontaneous activity, electrophysiology

20 pages, 6 figures



**Neocortical circuits exhibit spontaneous neuronal activity whose functional relevance remains enigmatic. Several proposed functions assume that sensory experience can influence subsequent spontaneous activity. However, long-term alterations in spontaneous firing rates following sensory stimulation have not been reported until now. Here we show that multi-whisker, spatiotemporally rich stimulation of mouse vibrissae induces a laminar-specific, long-term increase of spontaneous activity in the somatosensory cortex. Such stimulation additionally produces stereotypical neural ensemble firing patterns from simultaneously recorded single neurons, which are maintained during spontaneous activity following stimulus offset. The increased neural activity and concomitant ensemble firing patterns are sustained for at least 25 minutes after stimulation, and specific to layers IV and Vb. In contrast, the same stimulation protocol applied to a single whisker fails to elicit this effect. Since layer Vb has the largest receptive fields and, together with layer IV, receives direct thalamic and lateral drive, the increase in firing activity could be the result of mechanisms involving the integration of spatiotemporal patterns across multiple whiskers. Our results provide direct evidence of modification of spontaneous cortical activity by sensory stimulation and could offer insight into the role of spatiotemporal integration in memory storage mechanisms for complex stimuli.**

Even in the absence of sensory stimulation or motor output, neocortical circuits are not silent. Neurons exhibit highly stochastic *spontaneous* activity (Arieli et al., 1996; Azouz and Gray, 1999; Fox and Raichle, 2007; Ringach, 2009), which consumes a large fraction of the brain's metabolic budget (Sokoloff et al., 1955). Although often considered to be 'noise,' spontaneous activity has a strong spatio-temporal structure: it reflects the functional architecture of cortical circuits (Tsodyks et al., 1999), and resembles the patterns of activity produced by natural sensory stimulation. These factors are suggestive of a role in information processing. In particular, spontaneous cortical activity has been demonstrated to affect sensory responses (Erchova et al., 2002; Ferezou et al., 2007; Kenet et al., 2003). It has also been suggested that spontaneous activity may reflect learning and memory processes (Lewis et al., 2009). However, despite substantial work, the basic mechanisms for such associations at the neural circuit level remain enigmatic.

For spontaneous activity to be a mediating factor in learning and memory, spontaneous neocortical firing rates and concomitant spatial patterns of activity should show long-term changes after sensory events (Tegnér et al., 2002). There have been indications, in several modalities, of transient changes due to sensory stimulation. For instance, extensive (24 hour) stimulation of mouse whiskers leads to an increase in inhibitory synaptic density in somatosensory cortex, and a transient reduction in spontaneous firing (Knott et al., 2002; Quairiaux et al., 2007). In prefrontal cortex, elevated firing rates are maintained for a short time in the absence of a sensory stimulus during delay-memory tasks (Goldman-Rakic, 1995), suggesting the possibility that information might be maintained during spontaneous firing by similar firing rate elevations. Increased correlation between sensory-evoked and subsequent spontaneous cortical activity (Han et al., 2008), as well as a reduction in response variability (Yao et al., 2007), has been found following stimulation. Although these experiments indirectly suggest a role for spontaneous activity in the maintenance of sensory information for learning and memory, there are currently no reports of sustained changes in firing rates following sensory stimulation or of maintained patterns of ensemble activity in subsequent spontaneous epochs following a purely sensory stimulus.

To address these issues, we performed electrophysiological recordings (both single- and multi-unit) from the anaesthetized mouse somatosensory cortex to test the effect on spontaneous activity of a naturalistic, spatio-temporally complex, multi-whisker stimulation protocol (Fig. 1A). Our results show that repetitive multi-whisker stimulation with a spatiotemporally structured stimulus leads to persistent changes in spontaneous firing rates. These changes are layer-specific (concentrated in layers IV and Vb) and long-lasting (beyond 30 minutes). Through mathematical analysis of our single-unit measurements, we also showed that particular ensemble firing patterns in these layers are maintained in the subsequent spontaneous activity. As multi-whisker stimulation involves the activation of trans-columnar afferent circuits, we hypothesized that if the effect involved strengthening

of these connections, it would be absent when only one whisker was stimulated. We tested this in mice with all but the principal whisker trimmed, finding that single-whisker stimulation does not lead to neuronal firing rate increases.

## Materials and Methods

### *In vivo physiology*

Recordings were made from adult C56BL/6 mice, of 2-3 months of age. The animals were maintained in the Imperial College animal facility and used in accordance with UK Home Office guidelines. For surgery, mice were sedated with an initial intraperitoneal injection of urethane (1.1 g/kg, 10% w/v in saline) followed by an intraperitoneal injection of 1.5 ml/kg of Hypnorm/Hypnovel (a mix of Hypnorm in distilled water 1:1 and Hypnovel in distilled water 1:1; the resulting concentration being Hypnorm:Hypnovel:distilled water at 1:1:2 by volume), 20 minutes later. Atropine (1 ml/Kg, 10% in distilled water) was injected subcutaneously. Further supplements of Hypnorm (1 ml/kg, 10 % in distilled water) were administered intraperitoneally if required.

The mouse's body temperature was maintained at  $37 \pm 0.5$  °C with a heating pad. A tracheotomy was performed and an endotracheal tube (Hallowell EMC) was inserted to maintain a clear airway as previously described (Moldestad et al., 2009). After the animal was placed on the stereotaxic frame, a craniotomy was performed (approximately 0.5-1 mm in diameter) above barrel C2. A small window in the dura was opened to allow insertion of the multi-electrode array. The exposed cortical surface was covered with artificial cerebrospinal fluid (in mM: 150 NaCl, 2.5 KCl, 10 HEPES, 2 CaCl<sub>2</sub>, 1 MgCl<sub>2</sub>; pH 7.3 adjusted with NaOH) to prevent drying. The electrode was lowered into the brain, perpendicularly to the cortical surface, and allowed to settle for 30 minutes before recording began. The eyes were covered with ophthalmic lubricant ointment to prevent drying.

### *Data Acquisition and Analysis*

Multiunit activity recordings were obtained using a linear probe spanning all cortical layers, with 16 sites spaced at 50  $\mu$ m intervals (model: A1x16-3mm-50-413, NeuroNexus Technologies). Tetrode probes were used for experiments requiring single-unit isolation (A2x2-tet-3mm-150-312, NeuroNexus Technologies). Signals were acquired with the CED Power1401 data acquisition interface and Spike2 software (Cambridge Electronic Design Limited) and analyzed in Matlab (Mathworks). The extracellular signal was sampled at 20 kHz and local field potential (LFP) signals were extracted by bandpass filtering (1 to 300 Hz). The LFP signals were notch-filtered (centered around 50 Hz) prior to calculation of the power and spectrograms.

For offline spike sorting, the 300 Hz to 9 kHz band was extracted. Spike sorting was performed automatically using KlustaKwik (Harris et al., 2000), followed by manual cluster adjustment using the Klusters software package (Hazan et al., 2006).

Excitatory neurons were distinguished from inhibitory interneurons based on their peak to

trough distance (Niell and Stryker, 2008). Excitatory neurons were taken to be the single-units with peak-to-trough distance larger than 0.4 ms.

### *Statistics*

To isolate the MUA channels with significant responses (e.g. Fig. 1 *D*), we performed a tailed z-test to test the hypothesis that the distribution of the firing rate vector is different to the pre-stimulus firing rate distribution described by its mean and standard deviation. For statistical significance of the firing rate ratios, the one-sample tailed Student's t-test was used. The statistical tests were performed against the null hypothesis that the mean ratio equals one, at the 95% significance level.

To quantify possible modifications in the CSD sinks (e.g. Fig. 1 *C* and Fig. 5 *C*), we accepted the channels within layer IV and Vb with significant amplitude differences between sink and baseline (within 15 ms of stimulus onset). To do so, we used a Student's t-test to accept the channels whose mean during baseline was more positive than the sink minimum. We then estimated the statistical significance of the sink amplitude ratios, using one-sample tailed Student's t-test. The statistical tests were performed against the null hypothesis that the mean ratio equals one, at the 95% significance level.

### *Stimulation*

Rough grade (P40) sandpaper was driven using a servomotor controlled by pulse-width modulation, swept across the whiskers in the rostro-caudal axis. For multi-whisker stimulation, the whiskers were all cut to the same length of 10 mm immediately prior to electrophysiological recording, following standard procedures (see e.g. Huang et al 1998). For single-whisker stimulation, all whiskers were trimmed to their base except the principal whisker, which was cut to a length of 10 mm. In single-whisker experiments, care was taken to deflect only the principal whisker and not to cause displacement of neighboring whisker follicles. To obtain Post Stimulus Time Histogram (PSTH) characterization of neural responses, the whiskers were stimulated with brief (80 ms) protractions (-90°) and retractions (+90°) of the sandpaper, with a deflection every 2 seconds (Supplementary Fig 2). This PSTH stimulus did not appear to be sufficient to elicit changes in spontaneous activity. PSTH characterisations were repeated several times throughout each experiment to monitor sensory responsiveness and current source density (CSD) patterns throughout the laminar depth. For the primary (adapting) stimulus protocol, the servomotor was driven at 25 or 12.5 Hz, repeated for 5 minutes with a 50% duty cycle (0.8 sec ON, 0.8 sec OFF).

### *Histology*

To determine the position of the electrode in the cortex, histological procedures were performed as previously described (Blanche et al., 2005). Briefly, prior to insertion in the brain, the rear of the electrode shank was painted with orange fluorescent Sulfonated DiI (crystals dissolved in ethanol; SP -

DiI18(3), Invitrogen). For histological analysis, animals were overdosed with urethane and transcardially perfused with 1x PBS and 4% formaldehyde (16% formaldehyde in PBS, TAAB Laboratories Equipment Ltd). Brain slices were later treated with green fluorescent Nissl stain (Neurotrace 500/525, Molecular Probes). The electrode track, clearly demarcated by the SP-DiI against the Nissl-stained cortex, was then visualized on a confocal microscope (Leica SP5). Some experiments required the reconstruction of the probe trajectory over multiple sections. The brightness of the red (DiI) channel was adjusted to compensate for the reduced staining with depth of insertion, allowing us to optimize the matching of the electrode sites to anatomical (layer) context. Layer boundaries were assigned on the green (Nissl stained) channel, while the tip of the electrode was determined using the red channel. Merging the two channels then allowed us to determine the layer location of the 16 electrode sites by measuring away from the tip in 50-micron increments (Supplementary Fig. 1).

### *Current Source Density Analysis (CSD)*

To calculate the CSD, a linear probe containing 16 electrode sites with 50  $\mu\text{m}$  spacing (model: A1x16-3mm-50-413, NeuroNexus Technologies) was inserted into the barrel cortex. The signal was filtered (1-300 Hz) and down-sampled to 2 kHz. These local field potentials were averaged across trials with the same stimulus, the mean was subtracted for each electrode, and the MATLAB program *CSDplotter* (Pettersen *et al.*, 2006) was used to calculate the CSD.

### *Dimensionality reduction: Multi-Dimensional Scaling (MDS)*

In order to study changes of the state of the network due to sensory stimulation, we used MDS as previously described (Phoka *et al.*, 2012). Briefly, MDS operates on a geometric principle: it finds a projection onto a lower dimensional space that distorts minimally the distances between the data points (Kruskal, 1978). As a result, similar measurements in the original dataset remain close in the geometric projection, while dissimilar measurements are kept apart.

Our original state vector consists of the firing rates of  $N$  neurons over  $T$  time bins (concatenating pre, post2 and evoked2) giving rise to a  $[N \cdot T]$  firing rate matrix,  $R$ . The binning interval was chosen such that at least one neuron is firing over every time bin. The firing rate matrix was used to calculate a  $[T \cdot T]$  distance matrix  $D$ , whose elements correspond to the *cosine distance* between the state vector  $\mathbf{r}_{N \times 1}$  at any two time bins:

$$D_{t_1, t_2} = 1 - \frac{\mathbf{r}_{t_1}^T \mathbf{r}_{t_2}}{\sqrt{(\mathbf{r}_{t_1}^T \mathbf{r}_{t_1})(\mathbf{r}_{t_2}^T \mathbf{r}_{t_2})}}$$

MDS was then used to find a projection of the  $[N \cdot T]$  matrix  $R$  onto 2 dimensions to obtain a  $[2 \cdot T]$  matrix  $\tilde{R}$  that introduces minimal distortion to  $D$ .

The cosine distance matrix is used to exclude the possibility that changes in the state vector representation are affected by differences in the absolute magnitude of firing rates. Therefore the representation extracted by MDS represents the similarity of the *patterns* of activity across time, irrespective and exclusive of changes in the average levels of activity.

### Overlap Integral

As a simple measure to quantify the similarity between the cloud of points of the ‘pre’, ‘evoked2’ and ‘post2’ epochs in the 2D MDS representation, we estimate the centroid and covariance matrix of each cloud (represented by the corresponding ellipses) and we calculate their corresponding overlap integrals. Assuming that each ellipse represents a Gaussian probability distribution of the cloud of points, the overlap of two ellipses,  $A$  and  $B$ , is given by the overlap integral,  $I(A,B)$ , as previously described (Grima et al., 2010):

$$I(A,B) = \frac{C}{\sqrt{\det(\mathbf{A} + \mathbf{B})}} \exp \left[ -\frac{1}{2} \mathbf{R}^T (\mathbf{A}^{-1} + \mathbf{B}^{-1})^{-1} \mathbf{R} \right]$$

with  $\mathbf{A} = \sum_{i=1}^2 a_i^{-1} \mathbf{u}_i \mathbf{u}_i^T$  and  $\mathbf{B} = \sum_{i=1}^2 b_i^{-1} \mathbf{v}_i \mathbf{v}_i^T$ , where  $a_i$  (respectively,  $b_i$ ) are the semiaxes along the corresponding normalized eigenvectors  $\mathbf{u}_i$  (respectively,  $\mathbf{v}_i$ ) of the ellipses centered at  $\mathbf{R}_A$  (respectively,  $\mathbf{R}_B$ ), as obtained by diagonalizing the estimated covariance matrices.  $C = \left( \sqrt{4\pi^2} \prod_{i=1}^2 a_i b_i \right)^{-1}$  is a normalization constant and  $\mathbf{R} = \mathbf{R}_B - \mathbf{R}_A$  is the distance vector between the two ellipses.

This calculation is equivalent to obtaining the (undisplaced) convolution of two anisotropic Gaussians centered at different points of the MDS 2D space. Therefore, the overlap integral gives a measure of the intersection of the two distributions relative to their own variances.

To quantify the difference between ‘pre’ and ‘post2’ states, we define the *relative overlap integral* as the ratio of the (post2,evoked2) overlap integral over the (pre,evoked2) overlap integral:

$$I_r = \frac{I(\text{post2, evoked2})}{I(\text{pre, evoked2})}.$$

If the ‘pre’ and ‘post2’ states occupy the same position in the MDS representation, then  $I_r = 1$ . If  $I_r > 1$ , then the ‘post2’ state has more in common with the ‘evoked2’ state than ‘pre’ does. If  $I_r < 1$ , then ‘pre’ is more similar to ‘evoked2’ than ‘post2’. The values of  $I_r$  have been calculated across experiments to quantify the similarity of the ‘pre’, ‘evoked2’ and ‘post2’ for neuronal ensembles in different layers.

## Results



## Long-lasting modification of neuronal firing rates in layers IV and Vb

To determine whether naturalistic sensory stimulation can modify the spontaneous firing rates of populations of neurons within a cerebral cortical circuit, we recorded spontaneous multi-unit neural activity (MUA) before and after collective stimulation of the facial whiskers of an anesthetized mouse with coarse sandpaper with an oscillatory motion at 12.5 or 25 Hz along the rostro-caudal axis (Fig. 1A, duty cycle 0.8 seconds ON and 0.8 seconds OFF, see Methods). We simultaneously recorded from several layers using a linear probe with 16 recording sites spanning the depth of the somatosensory cortex. We recorded spontaneous activity for 5 minutes ('pre'), followed by 5 minutes of multi-whisker stimulation ('evoked'), in turn followed by 5 minutes of post-stimulus spontaneous activity ('post'), as shown in Fig. 1B. This protocol was performed twice in sequence. Results reported here are for stimulation at 25 Hz, unless otherwise mentioned.

Our experiments showed a striking increase in the post-stimulus spontaneous firing rates of layer IV and Vb neurons following the second stimulation (Fig. 1B), as established by histological analysis and in direct correspondence with the two observed CSD sinks of the barrel cortical column (Fig. 1C). The 16 electrode channels were assigned to cortical layers by careful alignment of immunohistological identification of the probe tip (Blanche et al., 2005) with current source density (CSD) analysis (Pettersen et al., 2006). The CSD distribution was calculated using the low-frequency component (1-300 Hz, LFP: local field potential) of the recorded signals (Mitzdorf, 1985; Freeman and Nicholson, 1975) and showed two current sinks appearing shortly after brief whisker stimulation at the locations of thalamocortical inputs (Swadlow et al., 2002), known to correspond to layers IV and Vb (Fig. 1C). We observed that the sink amplitude of the layer IV CSD distribution (Fig. 1C) increased by a factor of  $2.02 \pm 0.42$  (ratio  $\pm$  s.e.m.,  $P=0.019$ ,  $N=7$ ) following the first stimulation, and by a factor of  $2.40 \pm 0.41$  ( $P=0.005$ ,  $N=7$ ) following the second stimulation. The layer Vb CSD distribution remained unchanged following the stimulation events (Fig. 1C). The sink amplitude increase in layer IV, however, suggests the involvement of synaptic potentiation within and to layer IV (Mégevand et al., 2009).

Layer IV and Vb multi-unit sites exhibited an increase in spontaneous firing rates (post:pre ratio) directly related to the magnitude of the sensory response (evoked:pre ratio), which was strengthened with the repetition of the sensory events (Fig. 1D; Fig. 2). Channels that exhibited a significant sensory response, with significantly higher evoked firing rate than that of the pre-stimulus spontaneous activity (see e.g., Fig. 1D, filled points, and Supplementary Fig. 3) were identified and analyzed further. Multi-unit sites with significant sensory response in layer IV showed increased post-stimulus spontaneous activities by a ratio of  $1.49 \pm 0.18$  ( $p=0.0062$ ,  $N=18$ ) following the second stimulation (Fig. 1E). In the case of layer Vb, sites with significant sensory response (Fig. 1D, filled points) showed slightly decreased spontaneous firing rates (by a ratio of  $0.85 \pm 0.03$ ,  $P=6.9E-5$ ,  $N=16$ , Fig. 1E, empty asterisks) following the first stimulation, but increased their spontaneous 'post' activities by a ratio of  $1.37 \pm 0.13$  ( $P=0.0050$ ,  $N=14$ , Fig. 1E, filled asterisks) following the second

stimulation. The increase of spontaneous firing rates in layers IV and Vb was long-lasting, with duration of at least 25 minutes post-stimulus (Fig. 2 *B* and Supplementary Fig. 4). Neuronal activity in the other cortical layers remained largely unchanged (Fig. 1 *E*).

### **The increase in neuronal firing rates is unrelated to changes in cortical state**

Sensory processing may be dynamically modulated by the intrinsic cortical state, depending on whether the cortical network is synchronized or desynchronized (Marguet and Harris, 2011;Goard and Dan, 2009), as well as by the level of anaesthesia (Chauvette et al., 2011). Transitions between these states or levels are accompanied by modifications in 1-4 Hz (Chauvette et al., 2011) or 1-8 Hz (Marguet and Harris, 2011;Goard and Dan, 2009) power of the LFP, and of neuronal firing rates (Harris and Thiele, 2011).

To examine the possibility that changes of cortical state could play a role in our findings, we calculated a spectrogram using the LFP component of the recorded signal for each channel in layer Vb. We examined whether changes in power in the 1-4 Hz and 1-8 Hz frequency bands (post2:pre power ratio) relate to increases in the firing rates (post2:pre firing rate ratio). We found that the increase in firing rates is not accompanied by corresponding changes in power ratio in either 1-4 Hz or 1-8 Hz frequency bands for all sites within layer Vb and across experiments (Fig. 3 *B(i)* and *C(i)*). The mean values of LFP power in both bands showed no change between the pre-stimulus and post-stimulus spontaneous epochs: for 1-4 Hz,  $P=0.35$  for a paired Student's *t*-test, following the first stimulation and  $P=0.34$  following the second stimulation; for 1-8 Hz,  $P=0.45$  following the first stimulation and  $P=0.55$  following the second stimulation. These results suggest that the overall cortical state and anaesthesia levels remained constant before and after the sensory events, and independent of modifications in the firing rates. We therefore exclude the possibility that the persistent firing rate increase of layer IV or Vb neurons is due to intrinsic state transitions in the cortical network.

### **Sensory patterns of activity reverberate in subsequent spontaneous activity in layers IV and Vb**

While the observed multi-unit firing rate increase (Figs. 1 and 2) is directly related to the neuronal response during stimulation (Fig. 1*D*, and Supplementary Fig. 3), we further investigated whether the resulting spontaneous activity modifications were due to sensory reverberation. We carried out single-unit recordings to test whether the patterns of activity observed during sensory stimulation reverberate in subsequent spontaneous activity patterns. To achieve this, we used tetrode-configuration probes (2 shanks, Fig. 4*A*) to isolate excitatory single-unit activity (SUA) and repeated the same recording/stimulation protocol.

We first examined whether the observed firing rate increases were also detectable in single-units. We found that excitatory SUA in layer Vb increased following 25 Hz sandpaper stimulation and remained elevated thereafter (Fig. 4*A*, blue traces). In contrast, the average SUA firing rate recorded at electrode sites within layer VI returned to baseline following stimulation (Fig. 4*A*, purple traces). In

agreement with MUA results, the increase in spontaneous firing of layer Vb excitatory neurons depended strongly on the magnitude of the sensory response (Fig. 4B). Layer Vb excitatory neurons with significant sensory responses (Fig. 4B, filled markers), increased their spontaneous firing rates by a factor of  $1.88 \pm 0.35$  measured after the second sensory event ( $p=0.0091$ ,  $N=23$  units).

We next investigated whether the *patterns of activity* produced by the sensory events reverberate in the subsequent spontaneous activity using multidimensional scaling (MDS) to analyse the activity of the neuronal ensemble simultaneously recorded in each experiment. MDS finds a projection for a set of high-dimensional points onto a lower dimensional space that minimally distorts the distances between them, so that data points that are similar in the original higher dimensional space appear close in the projected lower dimensional space (see Materials and Methods). We used MDS to project the time evolution of the state vector of the neuronal ensemble recorded simultaneously in layer Vb and VI onto a 2D space. During the pre-stimulus spontaneous activity, the neuronal ensemble occupies a highly variable pattern space (Fig. 4C-D, orange) both for layers Vb and VI. In the case of layer VI, the pattern of excitatory single-unit activity converges onto a smaller volume of pattern space during stimulation (compare ‘pre’-orange to ‘evoked2’-grey, Fig. 5D), but relaxes back to its original pattern space after the stimulus (compare ‘pre’-orange to ‘post2’-red; Fig. 4D). In the case of layer Vb, MDS revealed that the pattern of excitatory single-unit activity converges onto a very small volume of pattern space during sensory stimulation (Fig. 4 C, ‘evoked2’-grey) indicating a highly similar state during stimulation. Furthermore, the state of layer Vb remains in a similar constrained area of pattern space post-stimulus (Fig.4 C, ‘post2’-red). Therefore, in layer Vb, the pattern space occupied post-stimulus resembles the one occupied during the sensory event, and both are substantially different to the pattern space occupied before the stimulus. This finding suggests that sensory events reverberate in the subsequent spontaneous activity in layer Vb.

To quantify these observations, we obtained the covariance matrices of the points for each epoch (represented by the ellipses), and calculated the *relative overlap integral*,  $I_r$ , between the epochs.  $I_r$  is a ratio that compares the overlap integral between ‘post2’ and ‘evoked2’ epochs with the overlap integral between ‘pre’ and ‘evoked2’ epochs based on the corresponding clouds of points in the 2D MDS representation (see (Grima et al., 2010) and Materials and Methods). If the states occupy the same space in the MDS representation (i.e. the stimulus has introduced no change in network state),  $I_r$  is equal to one. If the ‘post2’ state is more similar to the ‘evoked2’ state than the ‘pre’ state (i.e. the post-stimulus state of the network is more similar to its state during stimulation and considerably different to its pre-stimulus state), then  $I_r$  is greater than one. If ‘post2’ is more similar to ‘pre’ than ‘evoked2’ (i.e. the stimulus had an affect, but the network has relaxed back to its original state), then  $I_r$  is smaller than one.

The application this analysis technique to the data is shown in Figure 4 (also see Supplementary Fig. 5). In the case of layer VI, the neuronal pattern state converges during the

stimulus, but after stimulation returns to the highly variable pre-stimulus state. The relative overlap integral  $I_r$  between ‘pre’ and ‘post2’ is therefore not significantly different from 1 ( $I_r = 0.95$ , Fig. 4D). In contrast, the patterns in layer Vb converge during the stimulus and remain confined during subsequent spontaneous activity, as indicated by a relative overlap integral  $I_r$  substantially greater than 1 ( $I_r = 8.18$ , Fig 4C).

This behaviour was observed consistently across experiments, with the relative overlap integral being larger than one for layers Vb ( $\bar{I}_r = 4.18 \pm 1.41$ ) and IV ( $\bar{I}_r = 10.97 \pm 5.14$ ), and not different from one for layer VI ( $\bar{I}_r = 0.91 \pm 0.09$ ). Examples from each layer are shown in SI Fig. 5. The reverberation of sensory patterns of activity in subsequent spontaneous activity is therefore specific to layers IV and Vb.

### **Single-whisker stimulation does not induce spontaneous activity increase in layers IV and Vb**

Compared to neurons in the other cortical layers, layer Vb excitatory neurons have several distinct features: they receive excitatory inputs from all other cortical layers and neighbouring columns (Schubert et al., 2007b); they have larger receptive fields, as they respond to sensory inputs from approximately 4 to 13 surrounding whiskers (Ghazanfar and Nicolelis, 1999b); and they are in a position to reliably and temporally integrate these horizontal inputs (Boucsein et al., 2011b). In addition, they have a larger somatic excitation to inhibition ratio (Adesnik and Scanziani, 2010) and receive strikingly fewer inhibitory inputs (Schubert et al., 2007b).

Is the persistent increase in spontaneous activity we observed due to spatiotemporal integration of the structure of the sandpaper sensory input detected by the principal and surrounding whiskers? To test this hypothesis, we trimmed the surrounding whiskers and stimulated only the principal whisker with the same sensory protocol. We recorded MUA using a linear probe spanning the depth of the cortical layers, with each channel of the probe being assigned to a cortical layer by immunohistological (Fig. 5A) and CSD analyses, as described above.

We found that not only did spontaneous activity in layers IV and Vb fail to increase following single-whisker stimulation, but on average neuronal activity in layers II/III, IV, Vb and VI significantly decreased (Fig. 5B and D). Spontaneous activity in layers II/III decreased by a factor of  $0.76 \pm 0.05$  ( $P = 4.23 \times 10^{-4}$ ,  $N = 8$ ) following the first stimulation, and by a factor of  $0.67 \pm 0.06$  ( $P = 0.0044$ ,  $N = 4$ ) following the second stimulation. Layer IV spontaneous activity decreased by a factor of  $0.79 \pm 0.03$  following the first stimulation ( $P = 3.03 \times 10^{-6}$ ,  $N = 18$ , Fig. 5D, empty asterisks) and  $0.73 \pm 0.03$  following the second stimulation ( $P = 3.17 \times 10^{-7}$ ,  $N = 15$ , Fig. 5D, empty asterisks). Layer Vb neuronal activity decreased by a factor of  $0.91 \pm 0.03$  following the first stimulation ( $P = 0.0070$ ,  $N = 15$ , Fig. 5D, empty asterisks). Layer VI neuronal spontaneous activity decreased by a factor of  $0.73 \pm 0.06$  ( $P = 0.0013$ ,  $N = 7$ , Fig. 5D, empty asterisks) following the first stimulation. The decrease in layer IV activity was also accompanied by a small but consistent decrease in the strength of the layer IV sink

amplitude by a factor of  $0.61 \pm 0.08$  ( $P=0.0014$ ,  $N=6$ ) following the first stimulation and a factor of  $0.71 \pm 0.10$  ( $P=0.0071$ ,  $N=10$ ) following the second stimulation (Fig. 5C).

We thus conclude that the increase in spontaneous firing rates in layer IV and Vb require spatiotemporally rich stimulation across multiple whiskers, which is not present when only the principal whisker is stimulated.

## Discussion

A prominent feature of the somatosensory cortex in rodents is its organization into distinct cortical columns, with each column receiving inputs primarily from one facial whisker and secondary inputs from surrounding whiskers. Rodents rely on spatio-temporally rich information from the collective exploratory motion of their whiskers to identify objects in their environment (Diamond et al., 2008b; Arabzadeh et al., 2005). Multi-whisker stimulation activates lateral circuits via horizontal connections to layers IV (Fox et al., 2003b) and Vb (Ghazanfar and Nicolelis, 1999b), and afferent circuits via multi-whisker thalamocortical projection cells (Bruno and Simons, 2002b). In contrast, single whisker stimulation activates mainly intra-columnar circuits via the corresponding thalamic barreloid. It has been shown that stimulation of adjacent whiskers increases the cross-correlation between neurons in the corresponding cortical columns (Erchova and Diamond, 2004). We therefore reasoned that persistent modification of spontaneous activity might emerge from a naturalistic, spatiotemporally structured stimulus of all whiskers. The present study reveals for the first time persistent, layer-specific modification of spontaneous firing rates by sensory stimulation. We show that the firing rate increase is not due to a change in cortical state, since the cortical state remains unchanged between pre- and post-stimulus epochs (Fig. 3).

The firing rate increase is specific to layers IV and Vb and lasts for at least 25 minutes post-stimulus. Spontaneous firing rate increases following sensory experience have not previously been reported, although potentially related phenomena have been observed, including increases in spontaneous firing rate under a burst-conditioning paradigm (Erchova and Diamond, 2004), reverberation of stimulus-induced voltage-sensitive dye patterns during spontaneous activity (Han et al., 2008), and elevated firing rates in some neurons during the delay period (i.e., after off-set of the initial stimulus) of a working memory task (Fuster and Alexander, 1971; Miller et al., 1993). We speculate that these phenomena are related and that they reflect mechanisms for the maintenance of sensory information in synaptic and/or spontaneous neuronal firing dynamics.

Under Hebbian spike-timing dependent plasticity (STDP) protocols, the synapses are strengthened/depressed depending on the spike-pairing order. This mechanism predicts that patterns of firing repeatedly driven by sensory events should be reflected in subsequent activity due to attractor dynamics (Amit, 1995). Here we show that specifically in layers IV and Vb, the patterns of activity evoked during sensory stimulation in an ensemble of neurons reverberate in subsequent spontaneous activity. In layers IV and Vb, the patterns of activity during and following sensory events remain

substantially different to the highly variable pre-stimulus spontaneous state of activity (Fig. 4). We have previously shown similar results in a computational model of a neuronal network with STDP in the excitatory synapses, where the network converged onto a post-stimulus state sufficiently different from its pre-stimulus state following several repetitions of the same stimulus pattern (Phoka et al., 2012).

Spontaneous activity in layers IV and Vb increases only following multi-whisker stimulation. Therefore, the sustained increase in spontaneous activity in layers IV and Vb depends on the activation of lateral circuits and/or the magnitude of the afferent thalamocortical drive, since the effect disappears when mainly intra-columnar circuits are activated (Fig. 5). In support of such a hypothesis involving the modification of the magnitude of the afferent thalamocortical or lateral circuits, is the increase in layer IV amplitude of the CSD profile following the sensory stimulation protocol (Fig. 1). Such changes have previously been related to long-term potentiation (Mégevand et al., 2009). Layers IV and Vb receive direct thalamic (Swadlow et al., 2002) and lateral (Manns et al., 2004; Schubert et al., 2003) drive. Layer IV neurons receive primary horizontal connections from layer IV neurons in surrounding columns (Schubert et al., 2007b), whereas layer Vb neurons receive strong intracolumnar and transcolumar excitatory inputs from all cortical layers (Schubert et al., 2007b), suggesting the possibility that they integrate (Diamond et al., 2008b; Schubert et al., 2007b; Chagnac-Amitai and Connors, 1989; Bousein et al., 2011b) these inputs before projecting to downstream brain structures (Alloway, 2008).

Many important questions requiring further research emerge from our findings (Fig. 6). Could blocking the receptors involved in plasticity mechanisms eliminate the firing rate increase? What is the meaning of the differences observed when changing the stimulation frequency? Does the firing rate increase depend on the spatio-temporal structure of the stimulus, and would different sandpaper gratings yield different results? Although much remains to be explored, the possibility that the increases in firing rates are due to spatio-temporal integration remains an attractive hypothesis to explain the observed spontaneous activity modification in response to sensory events. More broadly, one could conjecture that the multi-whisker thalamocortical projections and intracortical horizontal connections play a pivotal role in information integration across multiple facial whiskers. It is therefore of interest to investigate whether similar results could hold in other sensory modalities. The persistent modification of spontaneous dynamics by sensory signals, as demonstrated here, may yield insight into the cortical basis of memory, by elucidating mechanisms for the integration of temporal and spatial context (Diamond et al., 2008b; Schubert et al., 2007b).

**Acknowledgments** We thank G. Hadjithomas for the drawings; A. Saleem and T. Litke for technical assistance; M. Diamond, K. Harris, K.H. Parker and D. Schubert for critical discussions. This work was supported by BBSRC DTA studentships (E.P. and A.B.), the EPSRC Strategic Support Fund (E.P., S.R.S. and M.B.), EPSRC EP/I017267/1 (M.B.), EPSRC EP/E002331/1 and EP/J501347/1



(S.R.S.).

The authors declare no conflict of interest.

## References

- Adesnik H, Scanziani M (2010) Lateral competition for cortical space by layer-specific horizontal inputs. *Nature* 464:1155-1160.
- Alloway KD (2008) Information processing streams in rodent barrel cortex: the differential functions of barrel and septal circuits. *Cereb Cortex* 18:979-989.
- Amit DJ (1995) The hebbian paradigm reintegrated: local reverberations as internal representation. *Behav Brain Sci* 18:617-626.
- Arabzadeh E, Zorzin E, Diamond ME (2005) Neuronal encoding of texture in the whisker sensory pathway. *PLoS Biol* 3:e17.
- Arieli A, Sterkin A, Grinvald A, Aertsen A (1996) Dynamics of ongoing activity: explanation of the large variability in evoked cortical responses. *Science* 273:1868-1871.
- Azouz R, Gray C (1999) Cellular mechanism contributing to response variability of cortical neurons in vivo. *J Neurosci* 19:2209-2223.
- Blanche TJ, Spacek MA, Hetke JF, Swindale NV (2005) Polytrodes: high-density silicon electrode arrays for large-scale multiunit recording. *J Neurophysiol* 93:2987-3000.
- Boucsein C, Nawrot MP, Schnepel P, Aertsen A (2011) Beyond the cortical column: abundance and physiology of horizontal connections imply a strong role for inputs from the surround. *Front Neurosci* 5:1-13.
- Brecht M, Grinevich V, Jin TE, Margrie T, Osten P (2006) Cellular mechanisms of motor control in the vibrissal system. *Pflügers Arch. - Eur. J. Physiol.* 453:269-281.
- Bruno RM, Simons DJ (2002) Feedforward mechanisms of excitatory and inhibitory receptive fields. *J Neurosci* 22:10966-10975.
- Chagnac-Amitai Y, Connors BW (1989) Synchronized excitation and inhibition driven by intrinsically bursting neurons in neocortex. *J Neurophysiol* 62:1149-1162.
- Chauvette S, Crochet S, Volgushev M, Timofeev I (2011) Properties of slow oscillation during slow-wave sleep and anesthesia in cats. *J Neurosci* 31:14998-15009.
- Diamond ME, von Heimendahl M, Knutsen PM, Kleinfeld D, Ahissar E (2008) 'Where' and 'what' in the whisker sensorimotor system. *Nature Rev Neurosci* 9:601-612.
- Erchova IA, Diamond ME (2004) Rapid fluctuations in rat barrel cortex plasticity. *J Neurosci* 24:5931-5941.
- Erchova IA, Lebedev MA, Diamond ME (2002) Somatosensory cortical neuronal population activity across states of anaesthesia. *European Journal of Neuroscience* 15:744-752.
- Ferezou I, Haiss F, Gentet LJ, Aronoff R, Weber B, Petersen CCH (2007) Spatiotemporal dynamics of

- cortical sensorimotor integration in behaving mice. *Neuron* 56:907-923.
- Fox K (2008) *Barrel Cortex*. Cambridge, UK: Cambridge University Press.
- Fox K, Wright N, Wallace H, Glazewski S (2003) The origin of cortical surround receptive fields studied in the barrel cortex. *J Neurosci* 23:8380-8391.
- Fox MD, Raichle ME (2007) Spontaneous fluctuations in brain activity observed with functional magnetic resonance imaging. *Nat Rev Neurosci* 8:700-711.
- Freeman JA, Nicholson C (1975) Experimental optimization of current-source density technique for anuran cerebellum. *J. Neurophysiol.* 38:369-382.
- Fuster JM, Alexander GE (1971) Neuron activity related to short-term memory. *Science* 173:652-654.
- Ghazanfar AA, Nicolelis MA (1999) Spatiotemporal properties of layer V neurons of the rat primary somatosensory cortex. *Cereb Cortex* 9:348-361.
- Goard M, Dan Y (2009) Basal forebrain activation enhances cortical coding of natural scenes. *Nature Neurosci* 12:1444-1449.
- Goldman-Rakic PS (1995) Cellular basis of working memory. *Neuron* 14:477-485.
- Grima R, Yaliraki SN, Barahona M (2010) Crowding-induced anisotropic transport modulates reaction kinetics in nanoscale porous media. *J Phys Chem B* 114:5380-5385.
- Han F, Caporale N, Dan Y (2008) Reverberation of recent visual experience in spontaneous cortical waves. *Neuron* 60:321-327.
- Harris KD, Henze DA, Csicsvari J, Hirase H, Buzsáki G (2000) Accuracy of tetrode spike separation as determined by simultaneous intracellular and extracellular measurements. *Journal of Neurophysiology* 84:401-414.
- Harris KD, Thiele A (2011) Cortical state and attention. *Nature Rev. Neurosci.* 12:509-523.
- Hazan L, Zugaro M, Buzsáki G (2006) Klusters, NeuroScope, NDManager: a free software suite for neurophysiological data processing and visualization. *Journal of neuroscience methods* 155:207-216.
- Huang W, Armstrong-James M, Rema V, Diamond ME and Ebner FF (1998). Contribution of supragranular layers to sensory processing and plasticity in adult rat barrel cortex. *J Neurophysiol* 80:3261-71.
- Jadhav SP, Wolfe J, Feldman DE (2009) Sparse temporal coding of elementary tactile features during active whisker sensation. *Nat Neurosci* 12:792-800.
- Jin TE, Witzemann V, Brecht M (2004) Fiber types of the intrinsic whisker muscle and whisking behavior. *J Neurosci* 24:3386-3393.
- Kenet T, Bibitchkov D, Tsodyks M, Grinvald A, Arieli A (2003) Spontaneously emerging cortical representations of visual attributes. *Nature* 425:954-956.
- Knott GW, Quairiaux C, Genoud C, Welker E (2002) Formation of dendritic spines with GABAergic synapses induced by whisker stimulation in adult mice. *Neuron* 34:265-273.
- Kruskal JB (1978) *Multidimensional Scaling*. SAGE Publications.



- Lewis CM, Baldassarre A, Comitteri G, Romani GL, Corbetta M (2009) Learning sculpts the spontaneous activity of the resting human brain. *Proc Natl Acad Sci U S A* 106:17558-17563.
- Lottem E, Azouz R (2009) Mechanisms of tactile information transmission through whisker vibrations. *J Neurosci* 29:11686-11697.
- Manns ID, Sakmann B, Brecht M (2004) Sub- and suprathreshold receptive field properties of pyramidal neurones in layers 5A and 5B of rat somatosensory barrel cortex. *J Physiol* 556:601-622.
- Marguet SL, Harris KD (2011) State-dependent representation of amplitude-modulated noise stimuli in rat auditory cortex. *J Neurosci* 31:6414-6420.
- Mercier BE, Legg CR, Glickstein M (1990) Basal ganglia and cerebellum receive different somatosensory information in rats. *Proceedings of the National Academy of Sciences* 87:4388-4392.
- Mégevand P, Troncoso E, Quairiaux C, Muller M, Michel MC, Kiss ZJ (2009) Long-term plasticity in mouse sensorimotor circuits after rhythmic whisker stimulation. *J Neurosci* 29:5326-5335.
- Miller EK, Li L, Desimone R (1993) Activity of neurons in anterior inferior temporal cortex during a short-term memory task. *J Neurosci* 13:1460-1478.
- Mitzdorf U (1985) Current source-density method and application in cat cerebral cortex: investigation of evoked potentials and EEG phenomena. *Physiol Rev* 65:37-100.
- Moldestad O, Karlsen P, Molden S, Storm JF (2009) Tracheotomy improves experiment success rate in mice during urethane anesthesia and stereotaxic surgery. *Journal of neuroscience methods* 176:57-62.
- Niell CM, Stryker MP (2008) Highly selective receptive fields in mouse visual cortex. *J Neurosci* 28:7520-7536.
- Pettersen KH, Devor A, Ulbert I, Dale AM, Einevoll GT (2006) Current-source density estimation based on inversion of electrostatic forward solution: Effects of finite extent of neuronal activity and conductivity discontinuities. *J Neurosci Methods* 154:116-133.
- Phoka E, Wildie M, Schultz SR, Barahona M (2012) Sensory experience modifies spontaneous state dynamics in a large-scale barrel cortical model. *J Comput Neurosci*, 33:323-339.
- Quairiaux C, Armstrong-James M, Welker E (2007) Modified sensory processing in the barrel cortex of the adult mouse after chronic whisker stimulation. *J Neurophysiol* 97:2130-2147.
- Ringach DL (2009) Spontaneous and driven cortical activity: implications for computation. *Curr Opin Neurobiol* 19:439-444.
- Schubert D, Kötter R, Staiger JF (2007a) Mapping functional connectivity in barrel-related columns reveals layer- and cell type-specific microcircuits. *Brain Struct Funct* 212:107-119.
- Schubert D, Kötter R, Staiger JF (2007b) Mapping functional connectivity in barrel-related columns reveals layer- and cell type-specific microcircuits. *Brain Struct Funct* 212:107-119.
- Schubert D, Kötter R, Zilles K, Luhmann HJ, Staiger JF (2003) Cell type-specific circuits of cortical

- layer IV spiny neurons. *J Neurosci* 23:2961-2970.
- Sokoloff L, Mangold R, Wechsler RL, Kenney C, Kety SS (1955) The effect of mental arithmetic on cerebral circulation and metabolism. *J Clin Invest* 34:1101-1108.
- Swadlow HA, Gusev AG, Bezdudnaya T (2002) Activation of a cortical column by a thalamocortical impulse. *J Neurosci* 22:7766-7773.
- Tegnér J, Compte A, Wang X-J (2002) The dynamical stability of reverberatory neural circuits. *Biol Cybern* 87:471-481.
- Tsodyks M, Kenet T, Grinvald A, Arieli A (1999) Linking spontaneous activity of single cortical neurons and the underlying functional architecture. *Science* 286:1943-1946.
- Wise SP, Jones EG (1977) Somatotopic and columnar organization in the corticotectal projection of the rat somatic sensory cortex. *Brain research* 133:223-235.
- Yao H, Shi L, Han F, Gao H, Dan Y (2007) Rapid learning in cortical coding of visual scenes. *Nat Neurosci* 10:772-778.

## Figure Legends

**Fig. 1.** Long-lasting increase in spontaneous activity in layers IV and Vb following sensory stimulation. (A) Experimental setup: sandpaper swept across the mouse whiskers in the rostro-caudal axis while simultaneously recording from the contralateral somatosensory cortex. (B) Typical MUA recording from a linear probe spanning the cortical depth. Sensory stimulation at 25 Hz for 5 minutes (indicated within white triangles  $\nabla$ ) induces an increase in spontaneous activity specific to layers IV and Vb, which is sustained for at least 25 minutes post-stimulation.  $\blacktriangledown$  denotes a pause between the recordings;  $\blacktriangledown$ PSTH denotes brief stimulation (see Fig. S4). (C) (i) Early sinks in layers IV and Vb (CSD, yellow) correspond to bands of increased spontaneous activity. (ii) Sensory stimulation induces a significant increase in the layer IV sink amplitude following the second stimulation. (D) Spontaneous activity increase is directly related to the response during stimulation ( $\circ\bullet$  first stimulation,  $\bullet$  second stimulation). Channels whose evoked firing rate distribution is significantly different to the distribution described by the mean and standard deviation of the pre-stimulus spontaneous activity are considered for further analysis (filled markers:  $\bullet$  first stimulation,  $\bullet$  second stimulation). (E) Layer Vb spontaneous activity significantly decreases following first stimulation. Layer Vb and IV spontaneous activity significantly increases following the second stimulation. Error bars indicate s.e.m. \*  $P<0.05$ , \*\*  $P<0.01$ , \*\*\*  $P<0.001$ , \*\*\*\*  $P<0.00001$  throughout.

**Fig. 2** Spontaneous activity increases for at least 25 minutes. (A) Five examples of MUA recordings with 25 Hz multi-whisker stimulation. Spontaneous activity was recorded for 5 minutes (pre) before the mystacial vibrissae were stimulated (evoked1 and evoked2). The start and end of the stimulation epochs are indicated by white triangles. Post stimulus activity (post1 and post2) was recorded for 5 minutes and then for a further 15 minutes following a 5-minute pause necessary to save the recorded data ( $\blacktriangledown$ ). The recording/stimulation was performed twice in sequence, to more robustly induce the effect. The mystacial vibrissae were stimulated briefly using sandpaper in order to calculate the CSD profiles and PSTHs on three occasions: at the beginning of the experiment, in between the two stimulation epochs, and at the end of the experiment ( $\blacktriangledown$ PSTH). (B) Layer IV and Vb firing rate increase was sustained for at least 25 minutes. We calculated the spontaneous firing rate during a period of 30 seconds immediately following the second stimulation protocol, and compared it with the spontaneous rate in the last 30 seconds of the recording (approximately 25 minutes later) for each of the channels in layers IV and Vb of the MUA. We found that 93% of the layer Vb MUA (N=13 out of 14) and 94% of the layer IV MUA (N=17 out of 18) channels remained within 100% of their immediate post-stimulus firing rate values.

**Fig. 3** Spontaneous activity increase in layer Vb is not related to cortical state modification. (A) A typical spectrogram from a channel in layer Vb, recorded during the second 25-Hz stimulation/recording. The spontaneous spectral content pre- and post-stimulus is similar. Note the visible intermodulation, i.e. the frequency content modulation between the 25 Hz stimulus frequency and the 1.6 second 50% duty cycle. (B) (i) There is no significant change in power in the 1-4 Hz band from pre to post2 (ratio of power post2/pre), plotted against the change in firing rate (ratio post2/pre) for each individual recording site within layer Vb across experiments (N=14). Recording sites from the same animal have the same color-coding. (ii) Average power in the 1-4 Hz band decreases during stimulation (evoked1, evoked2) but returns to baseline in the spontaneous epochs (post1 and post2). Comparing post1 to pre and post2 to pre yields no statistically significant difference, indicating a constant level of anaesthesia throughout the spontaneous recordings (N=14). (C) Same analysis as (B) for the 1-8 Hz band indicates that the cortical state remained at baseline throughout the spontaneous epochs. The comparison of post1 to pre and post2 to pre in (ii) yields no statistically significant differences either.

**Fig. 4.** Sensory patterns of activity reverberate into the subsequent spontaneous activity in layers IV and Vb. (A) Overlap of DiI and Nissl staining of a barrel cortical column showing location of tetrode sites within cortical column. Population firing rates remain at elevated levels following 25 Hz stimulation for tetrodes within layer Vb (blue), but return to baseline for tetrodes within layer IV (purple). Vertical scale bar corresponds to 0.2 spikes/sec; stimulus duration shown by horizontal bar. (B) Firing rate increase is directly related to the response during sensory event (○● first stimulation, ○● second stimulation). Single units with significant responses are analysed further (filled markers: ● first stimulation, ● second stimulation). (C) MDS was used with the cosine distance to project the vectors of firing rates of single units measured at each tetrode at different times onto a two-dimensional plane (each point corresponds to the state of the group of neurons at a given time-point). The state of collocated neurons converges to a stereotypical pattern of activity during stimulation, as shown by the restricted area on the MDS plane during the evoked epoch. For excitatory neurons in layer Vb, sensory stimulation induces reliable patterns of ensemble activity across time, occupying a smaller volume of MDS space than pre-stimulus spontaneous activity. Post-stimulus spontaneous activity patterns closely resemble the sensory-evoked patterns, as indicated by an overlap integral greater than one between the clouds of points in ‘pre’ and ‘post2’ ( $I_r = 8.18$ ). (D) Sensory stimulation has no effect on post-stimulus spontaneous activity patterns across layer VI single-units and the overlap integral between the cloud of points in ‘pre’ and ‘post2’ is not different from one ( $I_r = 0.95$ ).

**Fig. 5** Single-whisker stimulation fails to increase spontaneous activity in layers Vb or IV. (A) Overlap

of DiI and Nissl staining of a barrel cortical column with location of probe within cortical laminar structure. (B) Principal whisker stimulation does not increase spontaneous activity in layers IV and Vb. (C) Single-whisker stimulation leads to a decrease of layer IV sink amplitude. (D) Single-whisker stimulation significantly decreases the spontaneous activity in layers II/III, IV, Vb and VI.

**Fig. 6** Modification of somatosensory cortical circuitry following multi-whisker stimulation and comparison to single-whisker stimulation. (A) A single cortical column consists of five main laminae (II/III, IV, Va, Vb, VI). Cells in each layer receive intra-laminar connections (black arrows). Layers IV and Vb receive thalamocortical inputs (TH, green arrows) from one thalamic barreloid (Fox, 2008). Layer Vb is considered to provide the main output of the barrel cortical column (Schubert et al., 2007a) to downstream subcortical structures (Mercier et al., 1990; Wise and Jones, 1977) (orange arrow). (B) Single whisker stimulation mainly activates the corresponding cortical column. We find that stimulation of only one (the primary) whisker leads to a significant decrease in the firing rates in layers II/III, IV, Vb and VI (Fig. 6 B and D). It also leads to a decrease in the amplitude of the CSD sink amplitude in layer IV (Fig. 6 C), which we represent by weakening the thalamocortical and intra-layer IV connections (dotted green and black arrows, respectively). (C) Multi-whisker stimulation activates the measured barrel column as well as its surrounding columns (one of them represented with a blue outline). We find that multi-whisker stimulation leads to a significant, long-term increase of the activity of layer Vb and IV neurons (Fig. 1 B, E). This effect is accompanied by a significant increase in the amplitude of the CSD sink in layer IV (Fig. 1 C), represented here by strengthening the thalamocortical, trans-columnar and intra-layer IV connections (bold green, blue and black arrows, respectively). We suggest that multi-whisker stimulation potentiates afferent and/or trans-barrel connectivity via strengthening either thalamocortical (Bruno and Simons, 2002a), or lateral, trans-columnar connections to layers IV (Fox et al., 2003a) and Vb (Ghazanfar and Nicolelis, 1999a). Layer IV neurons receive primary horizontal connections from layer IV neurons from surrounding columns (Schubert et al., 2007a), whereas layer Vb neurons receive strong intracolumnar (black arrows and summation) and transcolumnar excitatory inputs (Schubert et al., 2007a) (blue arrows and summation). This suggests the possibility that layer Vb neurons may integrate (Ghazanfar and Nicolelis, 1999a; Bousein et al., 2011a; Diamond et al., 2008a; Schubert et al., 2007a) multi-whisker sensory inputs before projecting to downstream brain structures (orange arrow). We remark that the schematics shown here are for illustration only and do not represent the full connectivity within or between cortical columns. Particular attention has been given to the excitatory inputs to layer Vb for the purposes of explaining the experimental results.

Figure 1

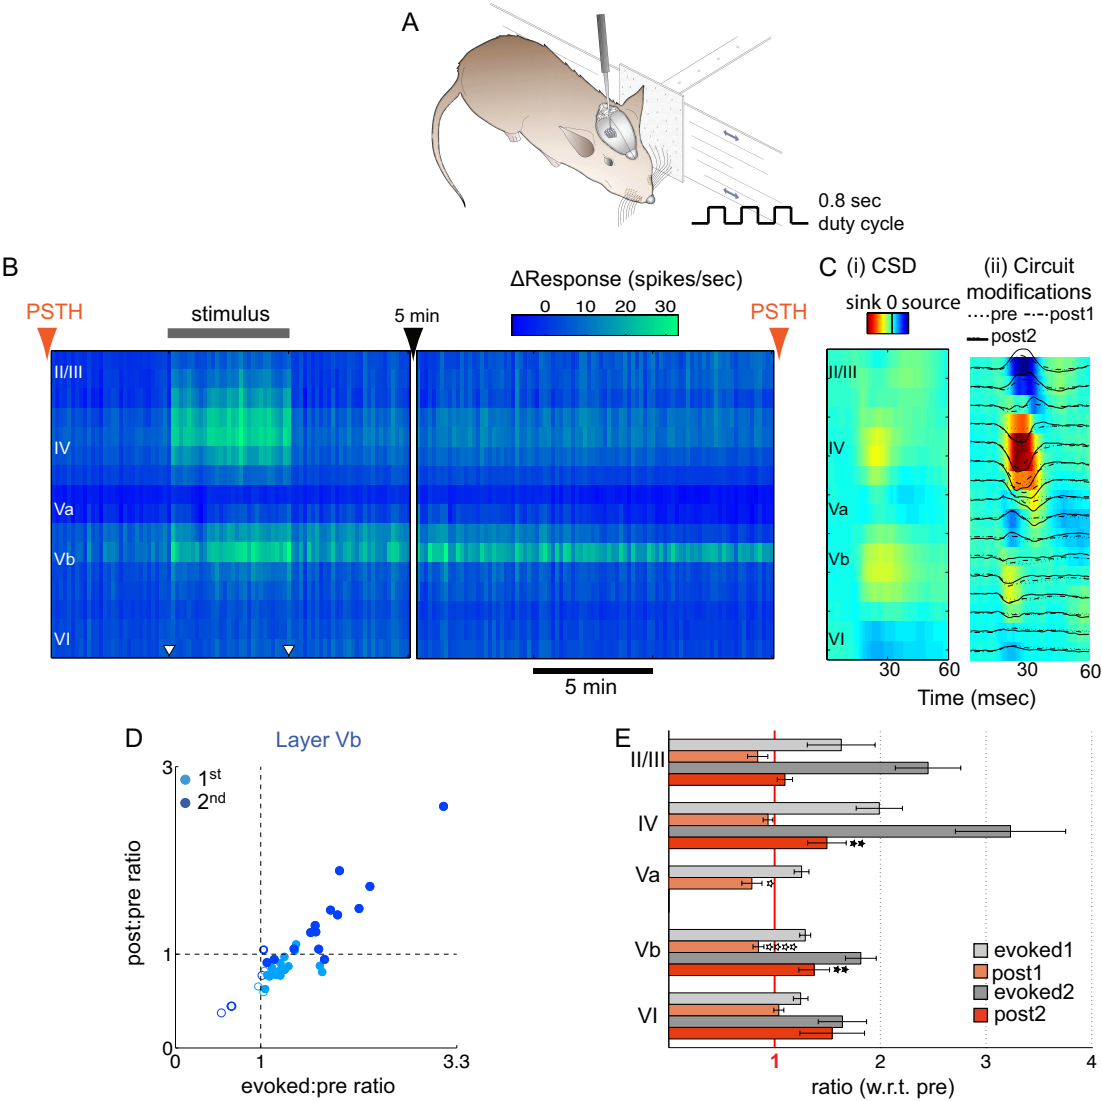

Figure 2

**A**

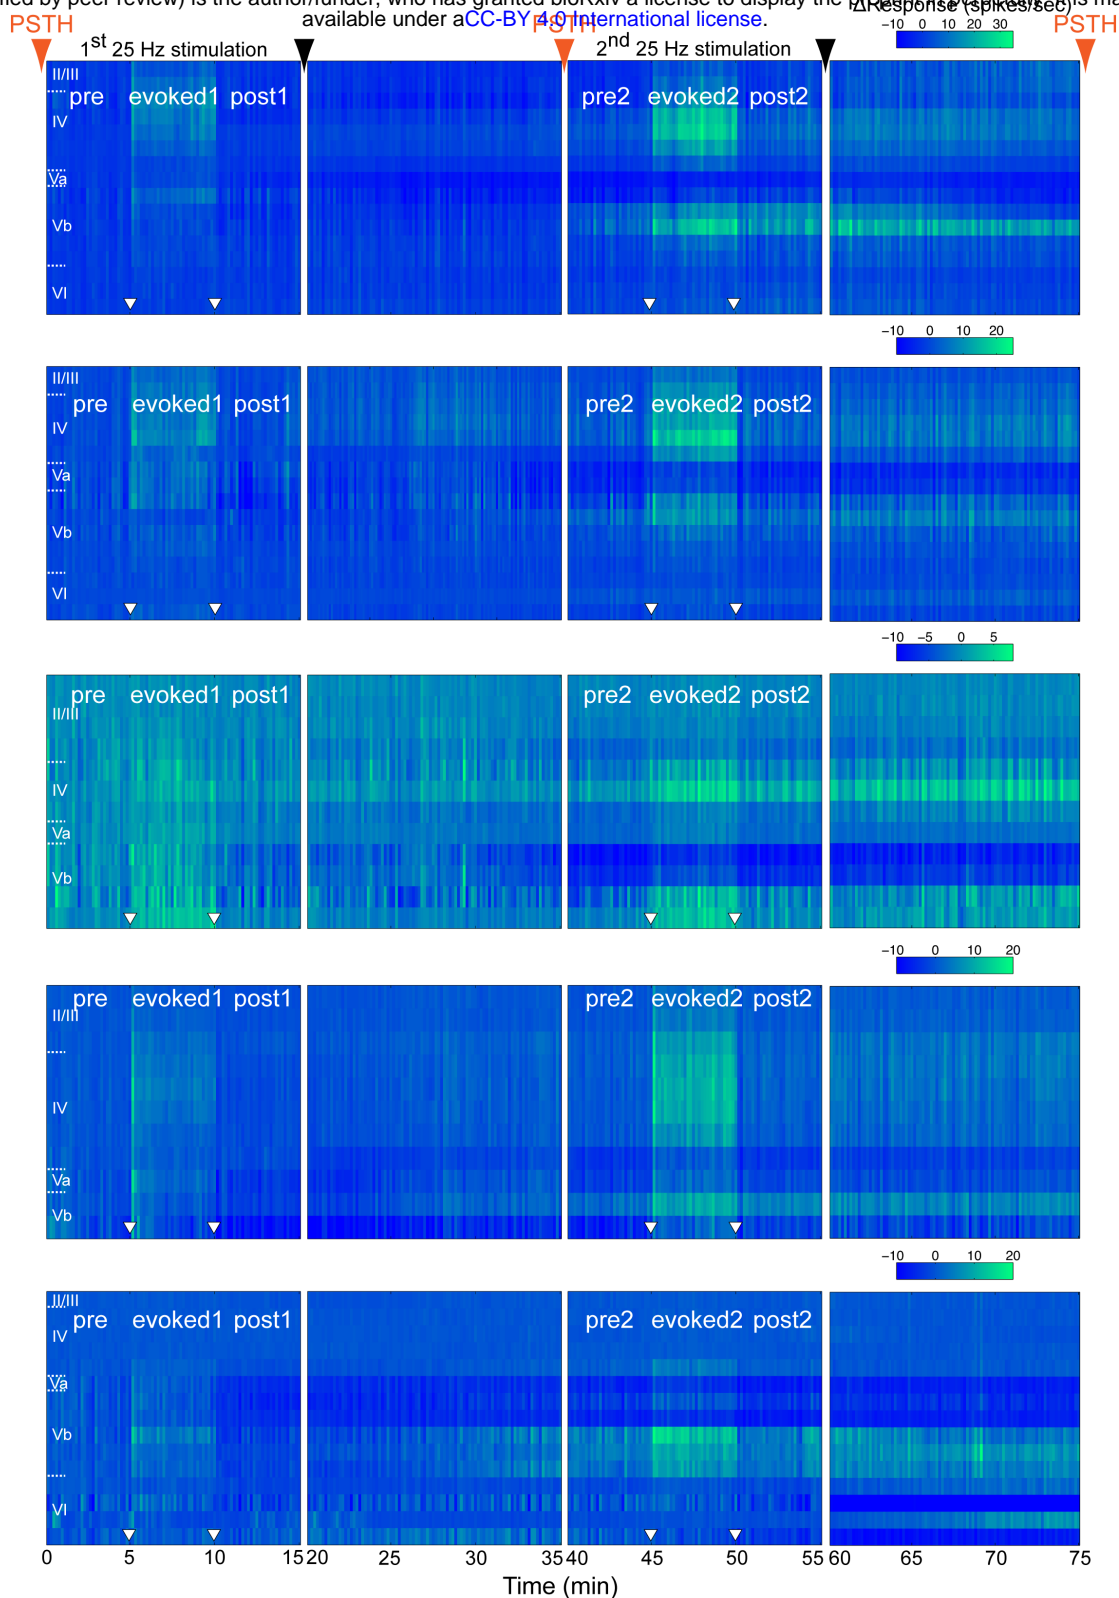

**B**

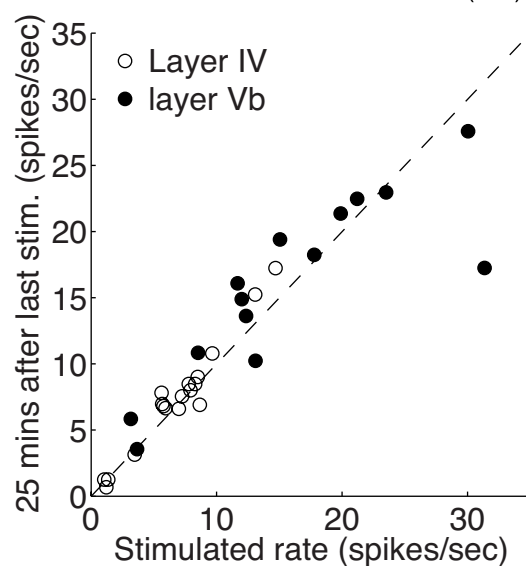

Figure 3

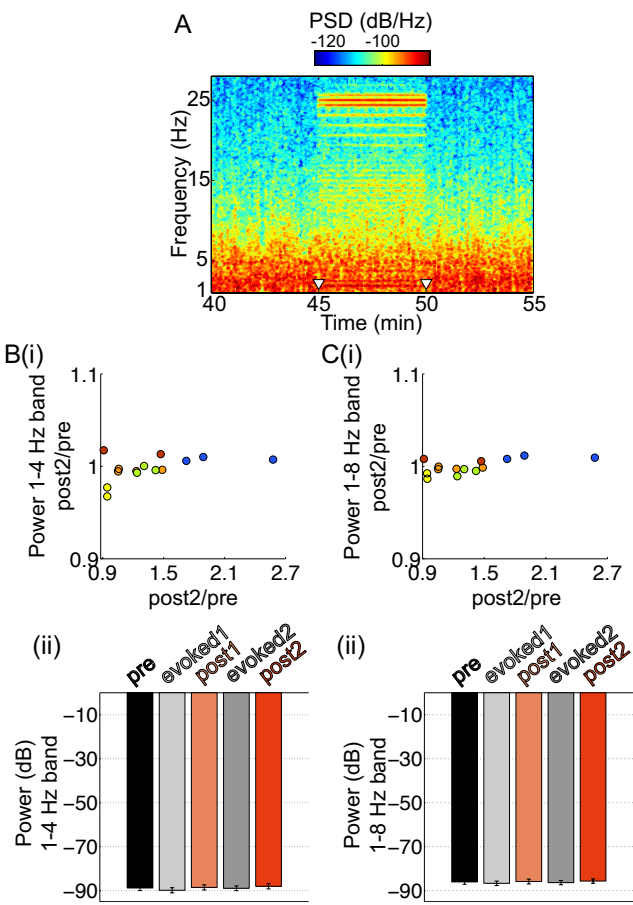



# Figure 4

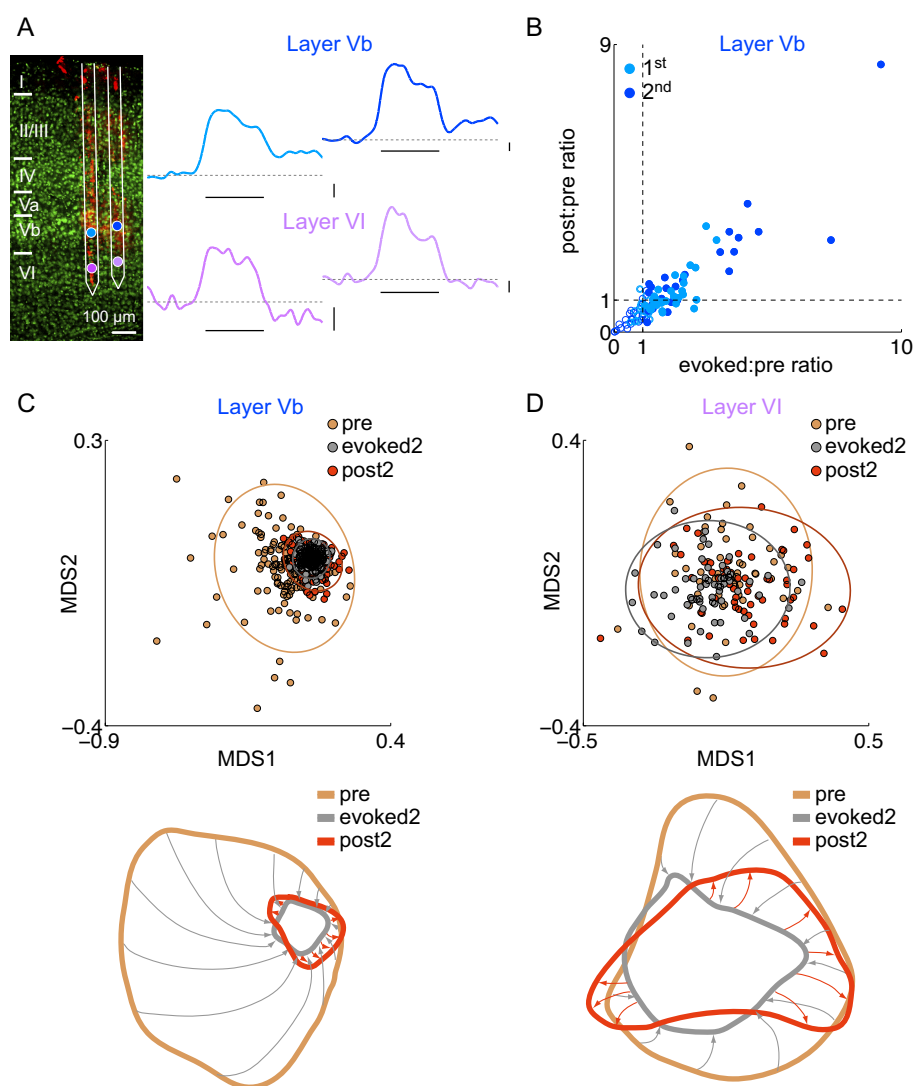

# Figure 5

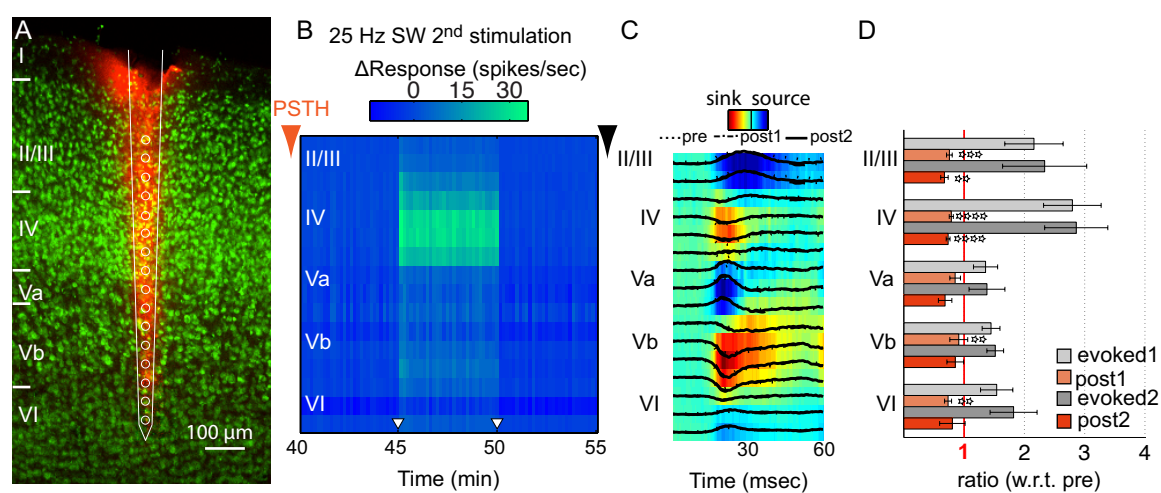

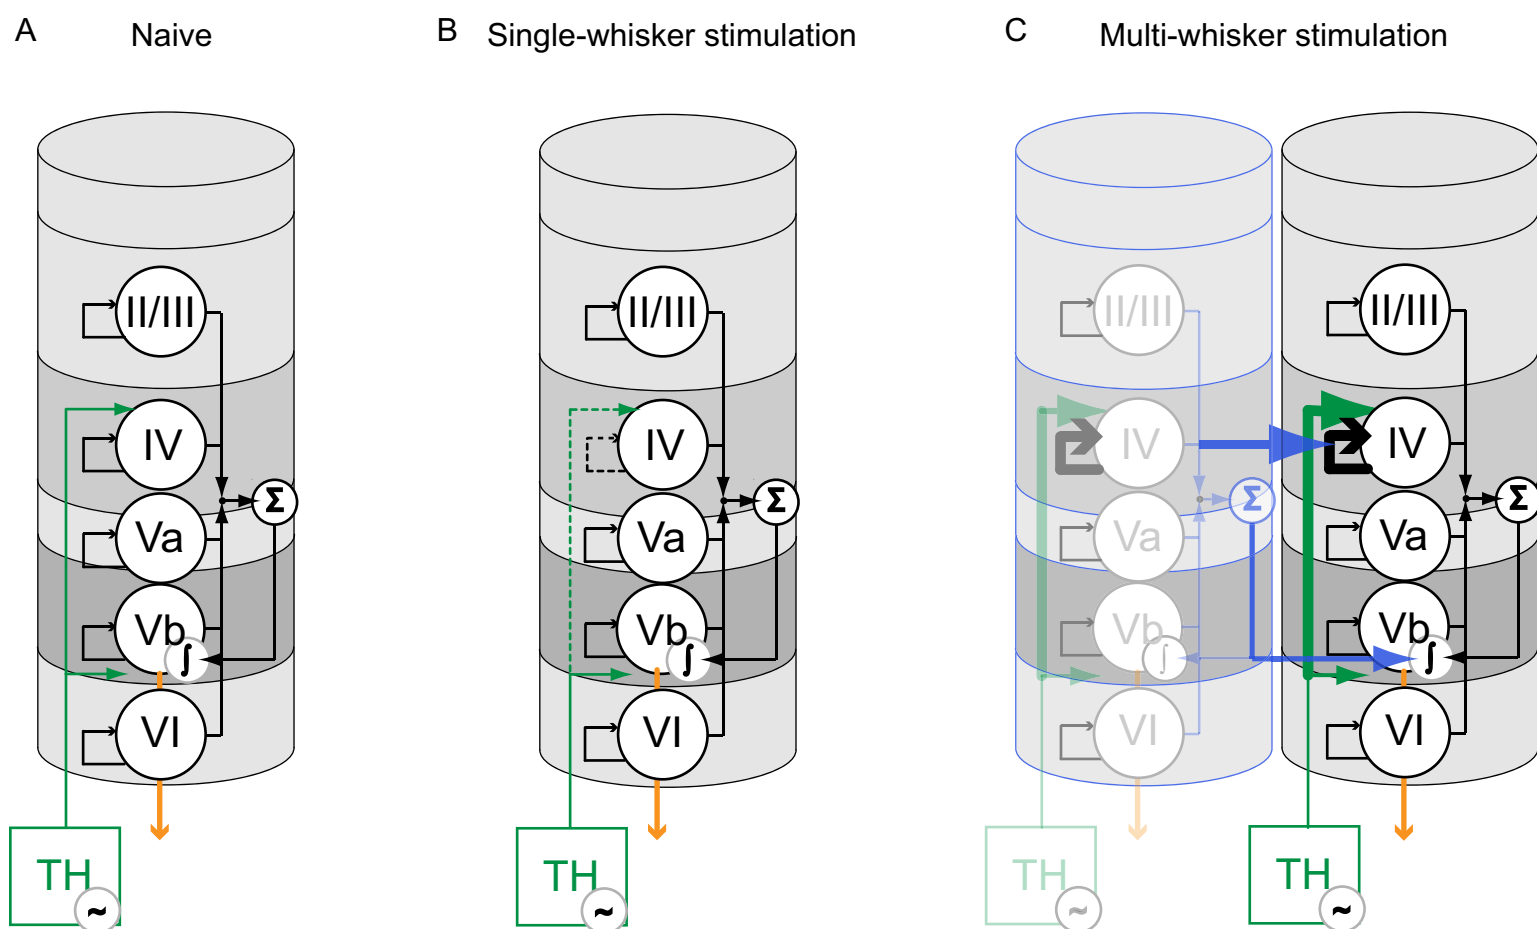

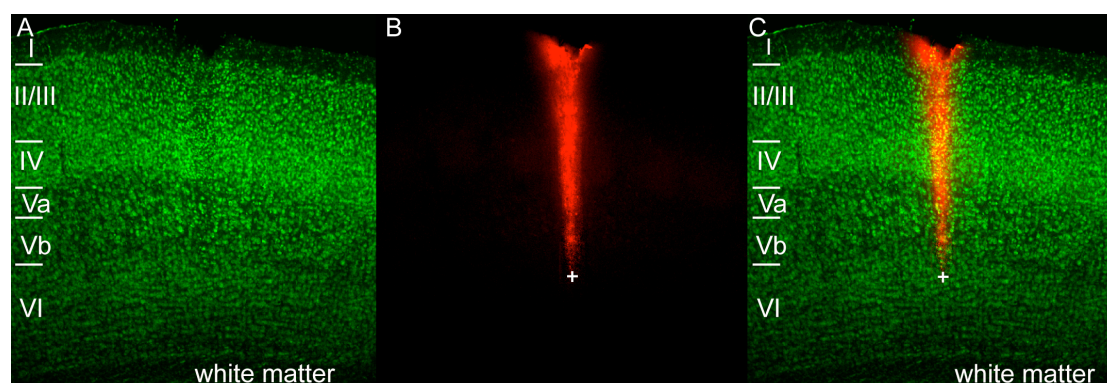

**Fig. S1** Layer assignment of electrode sites with fluorescent Nissl and DiI staining. (A) Coronal sections of the barrel cortex were treated with fluorescent Nissl stain to show the laminar structure of cortex. (B) The electrode was painted with lipophilic dye (DiI) prior to insertion into the brain. After fixation and imaging, this stain allows the visualization of the path taken by the probe, including its final depth (tip marked by white cross). (C) The two channels from (A) and (B) merged to allow the assignment of layer context to each electrode site.

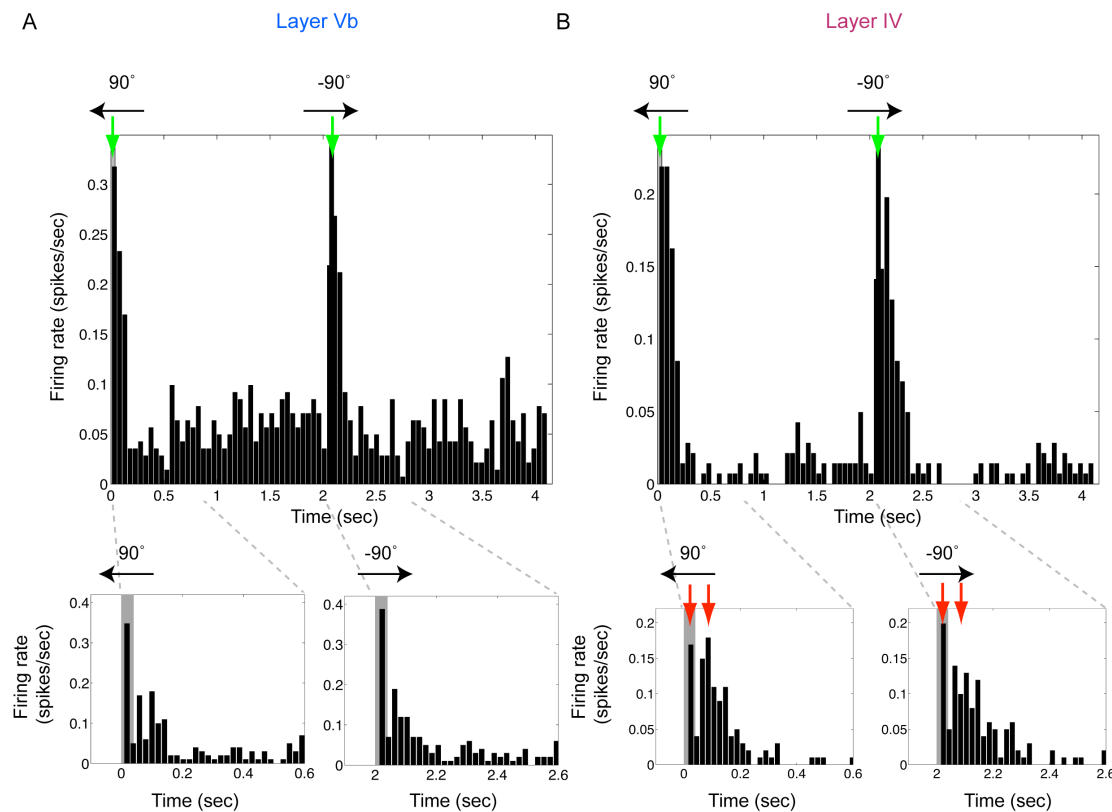

**Fig. S2** Post-stimulus time histograms (PSTHs) of MUA for the step stimulus demonstrate reliable and temporally precise responses to brief stimulation with sandpaper. In order to evaluate how well the neurons respond to the stimulus, and in order to identify direct thalamocortical inputs within the cortical column using CSD analysis, we stimulated the whiskers with brief (80 ms) deflections using sandpaper. The sandpaper was swept across the vibrissae every 2 seconds in mirrored protraction (-90°) and retraction (90°) directions. This protocol was performed at the very start of the recordings, in the middle of the two stimulation epochs and at the very end of the recordings (▼PSTH, Fig. S2). PSTHs shown here were obtained with 25 Hz stimulation from: (A) layer Vb and (B) layer IV. Neuronal responses align to stimulus onset (upper panels, green arrows). PSTHs on shorter time scales (lower panels) show two peaks (red arrows) attributed to a characteristic centre-surround triphasic component (1) (early depolarization-hyperpolarization-rebound depolarization). The LFP component of the recorded signal during these brief stimulations was used for the CSD analysis.

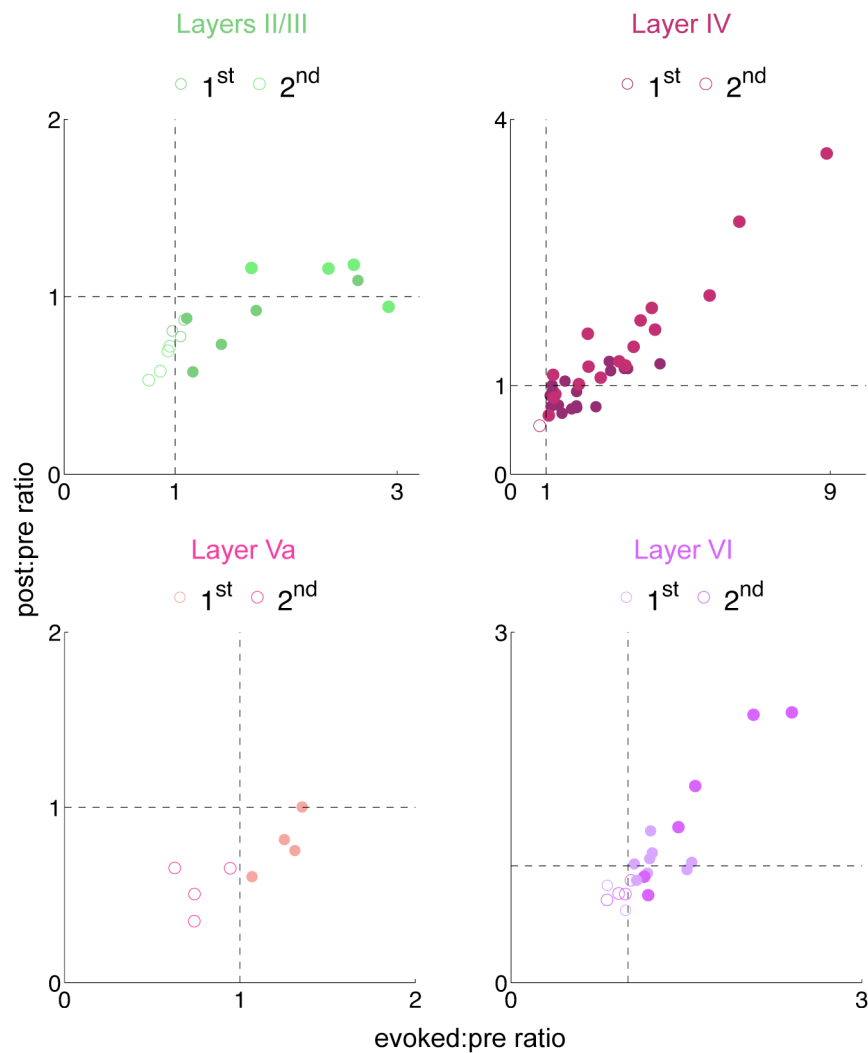

**Fig. S3** Modification of spontaneous activity following sensory stimulation (25 Hz) depends on the response during stimulation. The spontaneous activity increase (post:pre ratio) is plotted against the response during stimulation (evoked:pre ratio) for MUA recorded in each of the channels in layers II/III, IV, Va and VI (layer Vb is shown in Fig. 1 D). The channels with significant responses were identified as follows: for each channel we performed a one-tail (right) z-test to test the hypothesis that the evoked firing rate has a distribution significantly different to the distribution described by the mean and standard deviation of its pre-stimulus spontaneous firing rate. The significant channels so identified are indicated with filled symbols and they were used to calculate the population firing rates shown in Fig. 1 E.

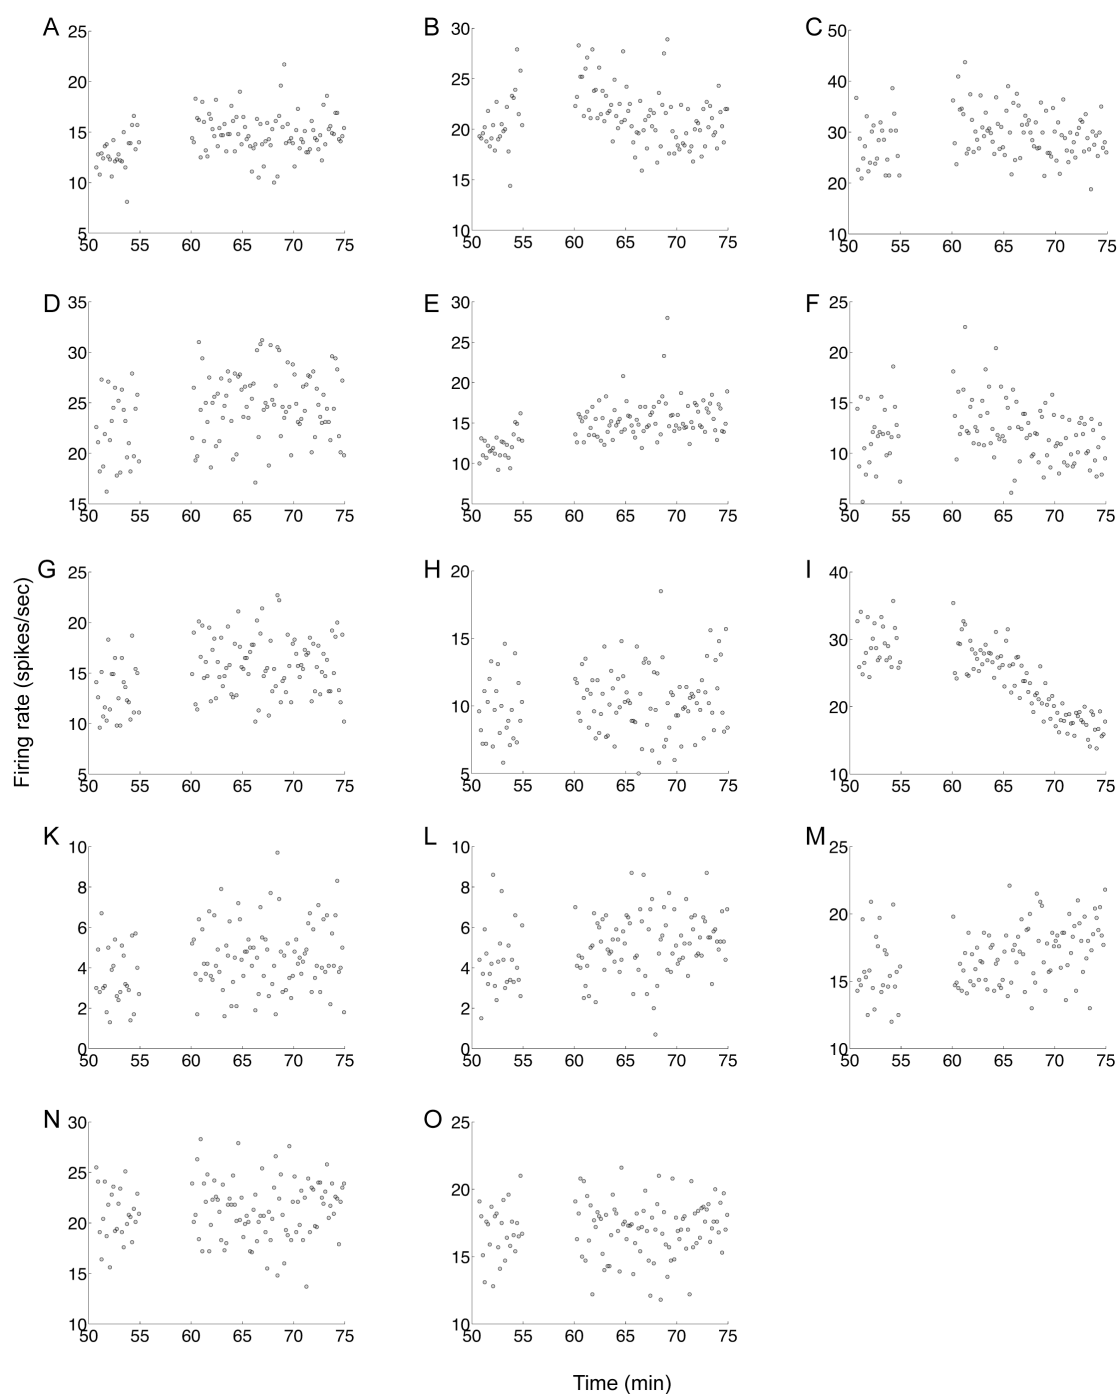

**Fig. S4** The elevated firing rate level in layer Vb is typically sustained for at least 25 minutes following the stimulus (25 Hz). (A-O) Spontaneous activity from individual channels within layer Vb (MUA linear probes) measured after the end of the second stimulation for a further 25 minutes. There is a 5-minute technical pause from 55 to 60 minutes (see Fig. S2). The firing rates, averaged every 10 seconds, remain at sustained levels for at least 25 minutes for all channels except one (panel I), even when starting from the highest response level (second stimulation).

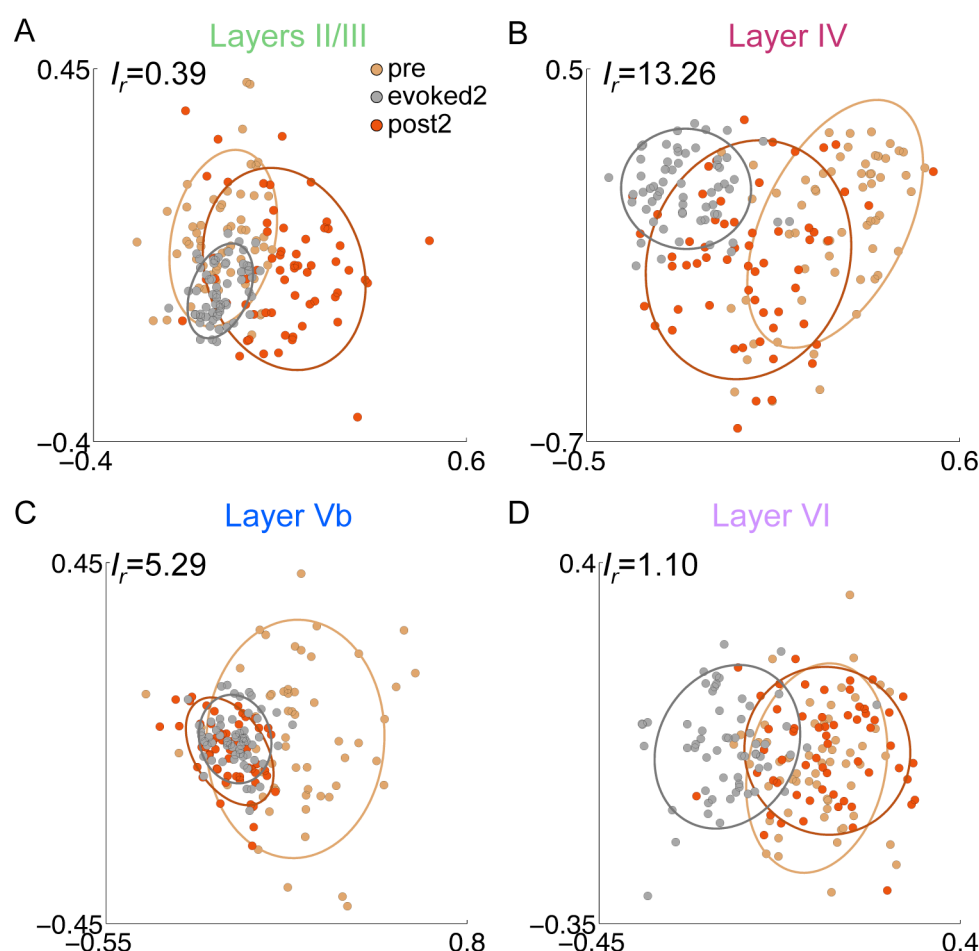

**Fig. S5** Multi Dimensional Scaling (MDS) analysis of the SUA data reveals distinct changes in the firing patterns of single units in different layers, following 12.5 Hz as well as 25 Hz stimulation (see Fig. 5 C and D for 25 Hz results). In layers IV and Vb, the similarity between the post-stimulus and evoked states is higher than between the pre-stimulus and evoked states. This effect is not present in layers II/III and VI. (A) Layer II/III neurons have an evoked2 state more similar to the pre-stimulus rather than post-stimulus state ( $I_r = 0.39$ ). (B) The post-stimulus state of neurons in layer IV is highly similar to evoked2 and distinct from pre ( $I_r = 13.26$ ). (C) Starting from a large region in the pre-stimulus state, the state of the neurons in layer Vb becomes confined to a small area of the plane during stimulation and remains so post-stimulus ( $I_r = 5.29$ ). (D) The post- and pre- stimulus states of neurons in layer VI are similar to each other and dissimilar to the evoked2 state ( $I_r = 1.10$ ).



|                                    | MUA          | No. sites, N<br>(1 <sup>st</sup> ) | No. sites, N<br>(2 <sup>nd</sup> ) |
|------------------------------------|--------------|------------------------------------|------------------------------------|
| <b>Figure 1</b><br>MW, 25Hz, n=5   | Layer II/III | 5                                  | 4                                  |
|                                    | IV           | 19                                 | 18                                 |
|                                    | Va           | 4                                  | -                                  |
|                                    | Vb           | 16                                 | 14                                 |
|                                    | VI           | 8                                  | 6                                  |
| <b>Figure 3</b><br>MW, 12.5Hz, n=4 | Layer II/III | 10                                 | 10                                 |
|                                    | IV           | 13                                 | 13                                 |
|                                    | Va           | 2                                  | 2                                  |
|                                    | Vb           | 16                                 | 11                                 |
|                                    | VI           | 7                                  | 2                                  |
| <b>Figure 5</b><br>SW, 25Hz, n=4   | Layer II/III | 8                                  | 4                                  |
|                                    | IV           | 18                                 | 15                                 |
|                                    | Va           | 4                                  | 5                                  |
|                                    | Vb           | 15                                 | 8                                  |
|                                    | VI           | 7                                  | 3                                  |

|                                   | CSD      | No. sites, N<br>(1 <sup>st</sup> ) | No. sites, N<br>(2 <sup>nd</sup> ) |
|-----------------------------------|----------|------------------------------------|------------------------------------|
| <b>Figure 1</b><br>MW, 25 Hz, n=2 | Layer IV | 7                                  | 7                                  |
|                                   | Vb       | 6                                  | 6                                  |
| <b>Figure 5</b><br>SW, 25 Hz, n=3 | Layer IV | 6                                  | 10                                 |
|                                   | Vb       | 9                                  | 9                                  |

| SUA                | No. units, N<br>(1 <sup>st</sup> ) | No. units, N<br>(2 <sup>nd</sup> ) |
|--------------------|------------------------------------|------------------------------------|
| Layer II/III (n=1) | 15                                 | 11                                 |
| IV (n=3)           | 39                                 | 40                                 |
| Vb (n=6)           | 64                                 | 40                                 |
| VI (n=2)           | 21                                 | 17                                 |
| Layer Vb           | 32                                 | 25                                 |
| VI                 | 17                                 | 19                                 |

|                                     | MUA          | No. sites, N<br>(1 <sup>st</sup> ) | No. sites, N<br>(2 <sup>nd</sup> ) |
|-------------------------------------|--------------|------------------------------------|------------------------------------|
| <b>Figure 1</b><br>MW, 25Hz, n=5    | Layer II/III | 5                                  | 4                                  |
|                                     | IV           | 19                                 | 18                                 |
|                                     | Va           | 4                                  | -                                  |
|                                     | Vb           | 16                                 | 14                                 |
|                                     | VI           | 8                                  | 6                                  |
| <b>Figure 3</b><br>SW, 25Hz, n=4    | Layer II/III | 8                                  | 4                                  |
|                                     | IV           | 18                                 | 15                                 |
|                                     | Va           | 4                                  | 5                                  |
|                                     | Vb           | 15                                 | 8                                  |
|                                     | VI           | 7                                  | 3                                  |
| <b>Figure S8</b><br>MW, 12.5Hz, n=4 | Layer II/III | 10                                 | 10                                 |
|                                     | IV           | 13                                 | 13                                 |
|                                     | Va           | 2                                  | 2                                  |
|                                     | Vb           | 16                                 | 11                                 |
|                                     | VI           | 7                                  | 2                                  |

  

|                                   | CSD      | No. sites, N<br>(1 <sup>st</sup> ) | No. sites, N<br>(2 <sup>nd</sup> ) |
|-----------------------------------|----------|------------------------------------|------------------------------------|
| <b>Figure 1</b><br>MW, 25 Hz, n=2 | Layer IV | 7                                  | 7                                  |
| <b>Figure 3</b><br>SW, 25 Hz, n=3 | Vb       | 6                                  | 6                                  |
|                                   | Layer IV | 6                                  | 10                                 |
|                                   | Vb       | 9                                  | 9                                  |

  

|                                   | SUA                | No. units, N<br>(1 <sup>st</sup> ) | No. units, N<br>(2 <sup>nd</sup> ) |
|-----------------------------------|--------------------|------------------------------------|------------------------------------|
| <b>Figure S5</b><br>MW, 12.5 Hz,  | Layer II/III (n=1) | 15                                 | 11                                 |
|                                   | IV (n=3)           | 39                                 | 40                                 |
|                                   | Vb (n=6)           | 64                                 | 40                                 |
|                                   | VI (n=2)           | 21                                 | 17                                 |
| <b>Figure 4</b><br>MW, 25 Hz, n=2 | Layer Vb           | 32                                 | 25                                 |
|                                   | VI                 | 17                                 | 19                                 |

**Table S1** Summary of recording sites (No. sites, N) in MUA recordings and single-units (No. units, N) in SUA recordings. Here we provide a summary of the statistics used in each of the main text and supplementary figures. The following abbreviations are used: MW: multi-whisker stimulation; SW: single-whisker stimulation; CSD: Current Source Density analysis. Other notation: 12.5 Hz and 25 Hz: stimulation frequency, 1<sup>st</sup> and 2<sup>nd</sup>: number of stimulation, n: number of animals for each type of experiment.
